# Supplementary material
Source: PubMed Central journal article supplement (PMC9283333)
Supplement: NIHMS1807324-supplement-5.pdf [file NIHMS1807324-supplement-5.pdf]

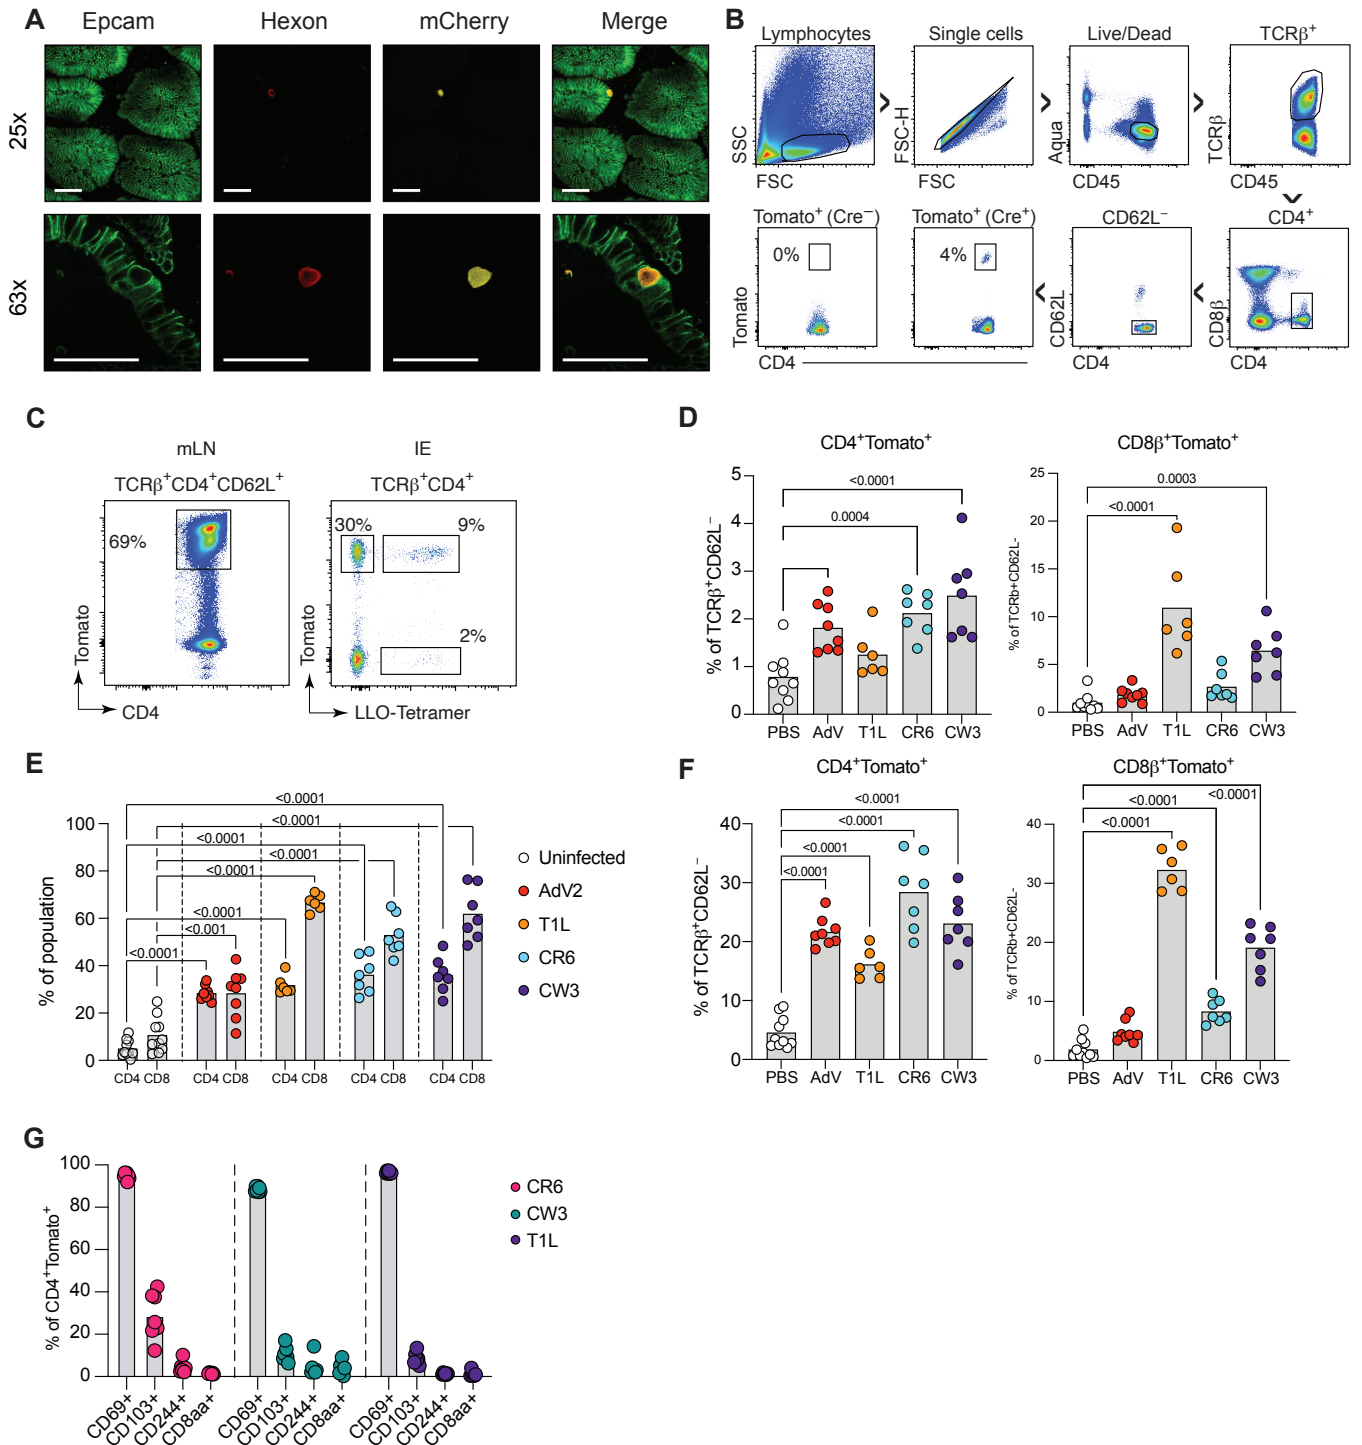

**Figure S1. (Related to Figure 1) AdV infection and T cell dynamics post viral infections. (A)** Mice were infected with  $10^7$  i.u. of AdV-mCherry and ileum were analyzed at day 6 post infection. Scale bar represents 60  $\mu$ m. **(B)** Gating strategy for IELs in iSell<sup>Tomato</sup> mice. **(C)** Left: iSell<sup>Tomato</sup> mice were treated with tamoxifen and mesenteric lymph nodes (mLN) were analyzed 3 days later. Right: tamoxifen-treated iSell<sup>Tomato</sup> mice were orally infected with  $10^8$  cfu of *Listeria monocytogenes* and lymphocytes were isolated from the epithelium (IE) and the frequency of Listeriolysin O (LLO)-tetramer<sup>+</sup> Tomato<sup>+</sup> cells among CD4<sup>+</sup> T cells was analyzed 9 days post-infection. **(D)** iSell<sup>Tomato</sup> mice were orally infected with  $10^7$  i.u. of AdV,  $10^8$  pfu of T1L,  $3 \times 10^6$  pfu of CR6 or  $3 \times 10^6$  of CW3, small intestine CD4<sup>+</sup> and CD8 $\alpha\beta$ <sup>+</sup> cells were analyzed for tomato expression within

TCR $\beta^+$ CD62L $^-$  IELs 10 days post infection. (E) iSell<sup>Tomato</sup> mice were orally infected with 10<sup>7</sup> i.u. of AdV, 10<sup>8</sup> pfu of T1L, 3x10<sup>6</sup> pfu of CR6 or 3x10<sup>6</sup> of CW3, TCR $\beta^+$ CD4 $^+$ CD62L $^-$  and TCR $\beta^+$ CD8 $\alpha\beta^+$ CD62L $^-$  small intestine LP cells were analyzed for tomato expression 10 days post infection. (F) iSell<sup>Tomato</sup> mice were orally infected with 10<sup>7</sup> i.u. of AdV, 10<sup>8</sup> pfu of T1L, 3x10<sup>6</sup> pfu of CR6 or 3x10<sup>6</sup> of CW3, small intestine CD4 $^+$  and CD8 $\alpha\beta^+$  cells were analyzed for tomato expression within TCR $\beta^+$ CD62L $^-$  LP lymphocytes 10 days post infection. (G) iSell<sup>Tomato</sup> mice were orally infected with 10<sup>8</sup> pfu of T1L, 3x10<sup>6</sup> pfu of CR6 or 3x10<sup>6</sup> of CW3, TCR $\beta^+$ CD4 $^+$ CD62L $^-$ Tomato $^+$  IELs were analyzed for CD69, CD103, CD244 and CD8 $\alpha\alpha$  expression 10 days post infection. Data are expressed as mean of individual mice, for D, E and F (n=8 for AdV, n = 6 for CW3 and n = 7 for CR6 and T1L, of two independent experiments), for G (n = 7 of two independent experiments for CR6 and CW3, n = 6 of two independent experiments for T1L). p values as indicated, One-way ANOVA plus Bonferroni test in D, E and F.

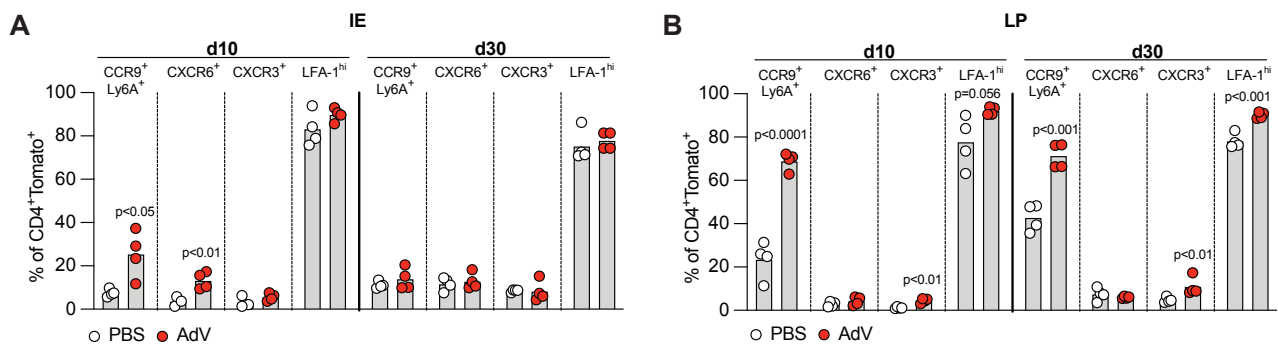

**Figure S2. (Related to Figure 3) Characterization of recently recruited CD4<sup>+</sup>Tomato<sup>+</sup> IE T cells post AdV infection. (A-C)** iSell<sup>Tomato</sup> mice were orally infected with 10<sup>7</sup> i.u. of AdV, small intestine IE (A) and LP (B) TCR $\beta^+$ CD4 $^+$ CD62L $^-$ Tomato $^+$  T cells were analyzed for CCR9, Ly6A, CXCR3, CXCR6, LFA-1 expression 10- and 30-days post infection. Data are expressed as mean of individual mice, for A and B (n = 4, one experiment). p values as indicated, Student's t Test in A and B.

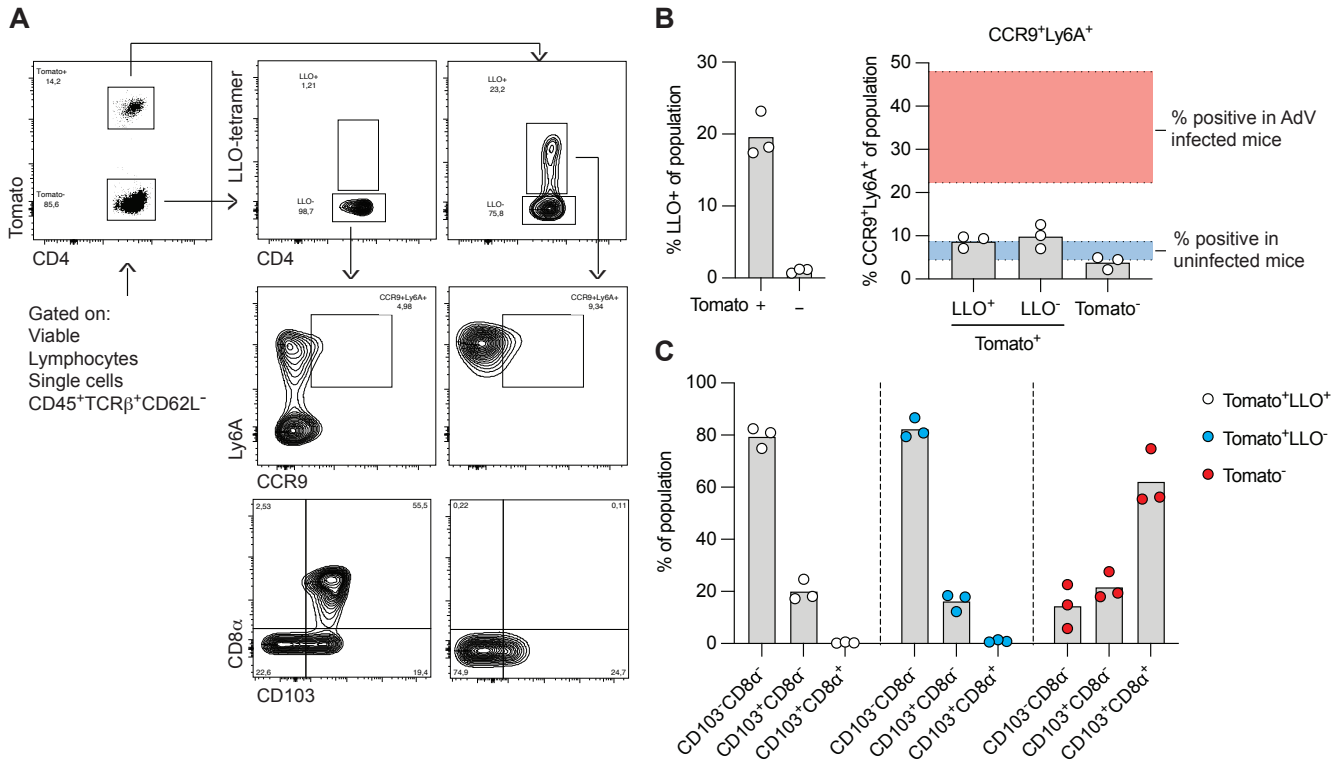

**Figure S3. (Related to Figure 3) Analysis of iSell<sup>Tomato</sup> mice 9 days post *Listeria monocytogenes* infection.** iSell<sup>Tomato</sup> mice were orally infected with  $10^8$  cfu of *Listeria monocytogenes* 10403S-inIA and small intestine TCRβ<sup>+</sup>CD4<sup>+</sup>CD62L<sup>-</sup> IE T cells were analyzed for Listeriolysin-O (LLO) specificity and Tomato, CD8α, CCR9, Ly6A and CD103 expression 9 days post infection. **(A)** Representative plots of LLO-tetramer gating and sub-gating. **(B)** Frequency of LLO-tetramer<sup>+</sup> (left) and CCR9<sup>+</sup>Ly6A<sup>+</sup> (right) cells among indicated populations. Colored area in the right graph represents CCR9<sup>+</sup>Ly6A<sup>+</sup> cells within CD4<sup>+</sup>Tomato<sup>+</sup> T cell post AdV infection mice (red area) or control mice (blue area). **(C)** Frequency of CD103<sup>+</sup> and CD8α<sup>+</sup> cells among indicated populations. Data are expressed as mean of individual mice, n = 3, one experiment.

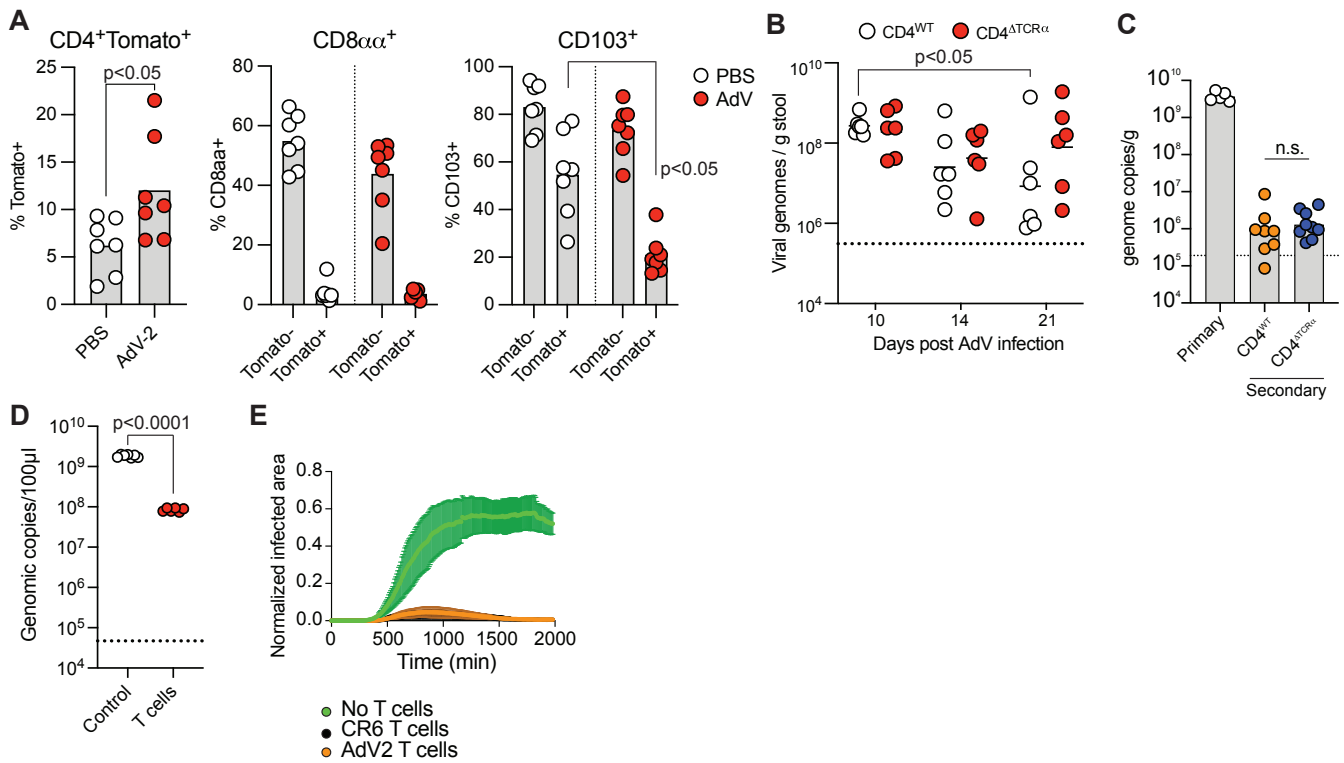

**Figure S4. (Related to Figure 3 and Figure 4) Analysis of iSell<sup>Tomato</sup> mice 30 days post AdV infection.**

(A) iSell<sup>Tomato</sup> mice were orally infected with  $10^7$  i.u. of AdV and TCR $\beta^+$ CD4<sup>+</sup>CD62L<sup>-</sup> IELs were analyzed for Tomato, CD8 $\alpha\alpha$  and CD103 expression 30 days post infection. (B) Viral genome copies of AdV per gram of feces of AdV-infection over time of WT and iCD4 $\Delta$ TCR $\alpha$  mice treated with tamoxifen at day 6 and 8 post infection. (C) Viral genome copies of AdV per gram of feces of AdV-infection of WT or iCD4 $\Delta$ TCR $\alpha$  mice after primary infection (day 10 post infection) or secondary infection (60 days post primary infection, mice were treated with tamoxifen 1 and 3 days before secondary infection). (D) Viral genome copies of AdV-GFP per 100  $\mu$ l of supernatant from organoid cultures incubated for 48 hours with or without CD4<sup>+</sup>Tomato<sup>+</sup> IE T cells derived from the small intestine of AdV-infected iSell<sup>Tomato</sup> mice 10 days post infection. (E) iSell<sup>Tomato</sup> mice were orally infected with  $10^7$  i.u. of AdV, small intestine IE CD4<sup>+</sup>CD62L<sup>-</sup>Tomato<sup>+</sup> T cells was sorted 10 days post-infection and co-cultured with MHCII<sup>-/-</sup> organoids. Data are expressed as mean of individual mice, except for D and E, data are expressed as mean of organoid supernatant or individual organoids, respectively. For A (n = 7 of two independent experiments), for B (n = 6, two independent experiments), for C (n = 5-9, one experiment), for D (n = 6-7, two independent experiments), and for E (n = 5, one experiment). p values as indicated, Student's t-test in A, C and D. Student's t-test in B when comparing between group within time points (log10 transformed) or one-way ANOVA plus Bonferroni test in B when comparing along time.

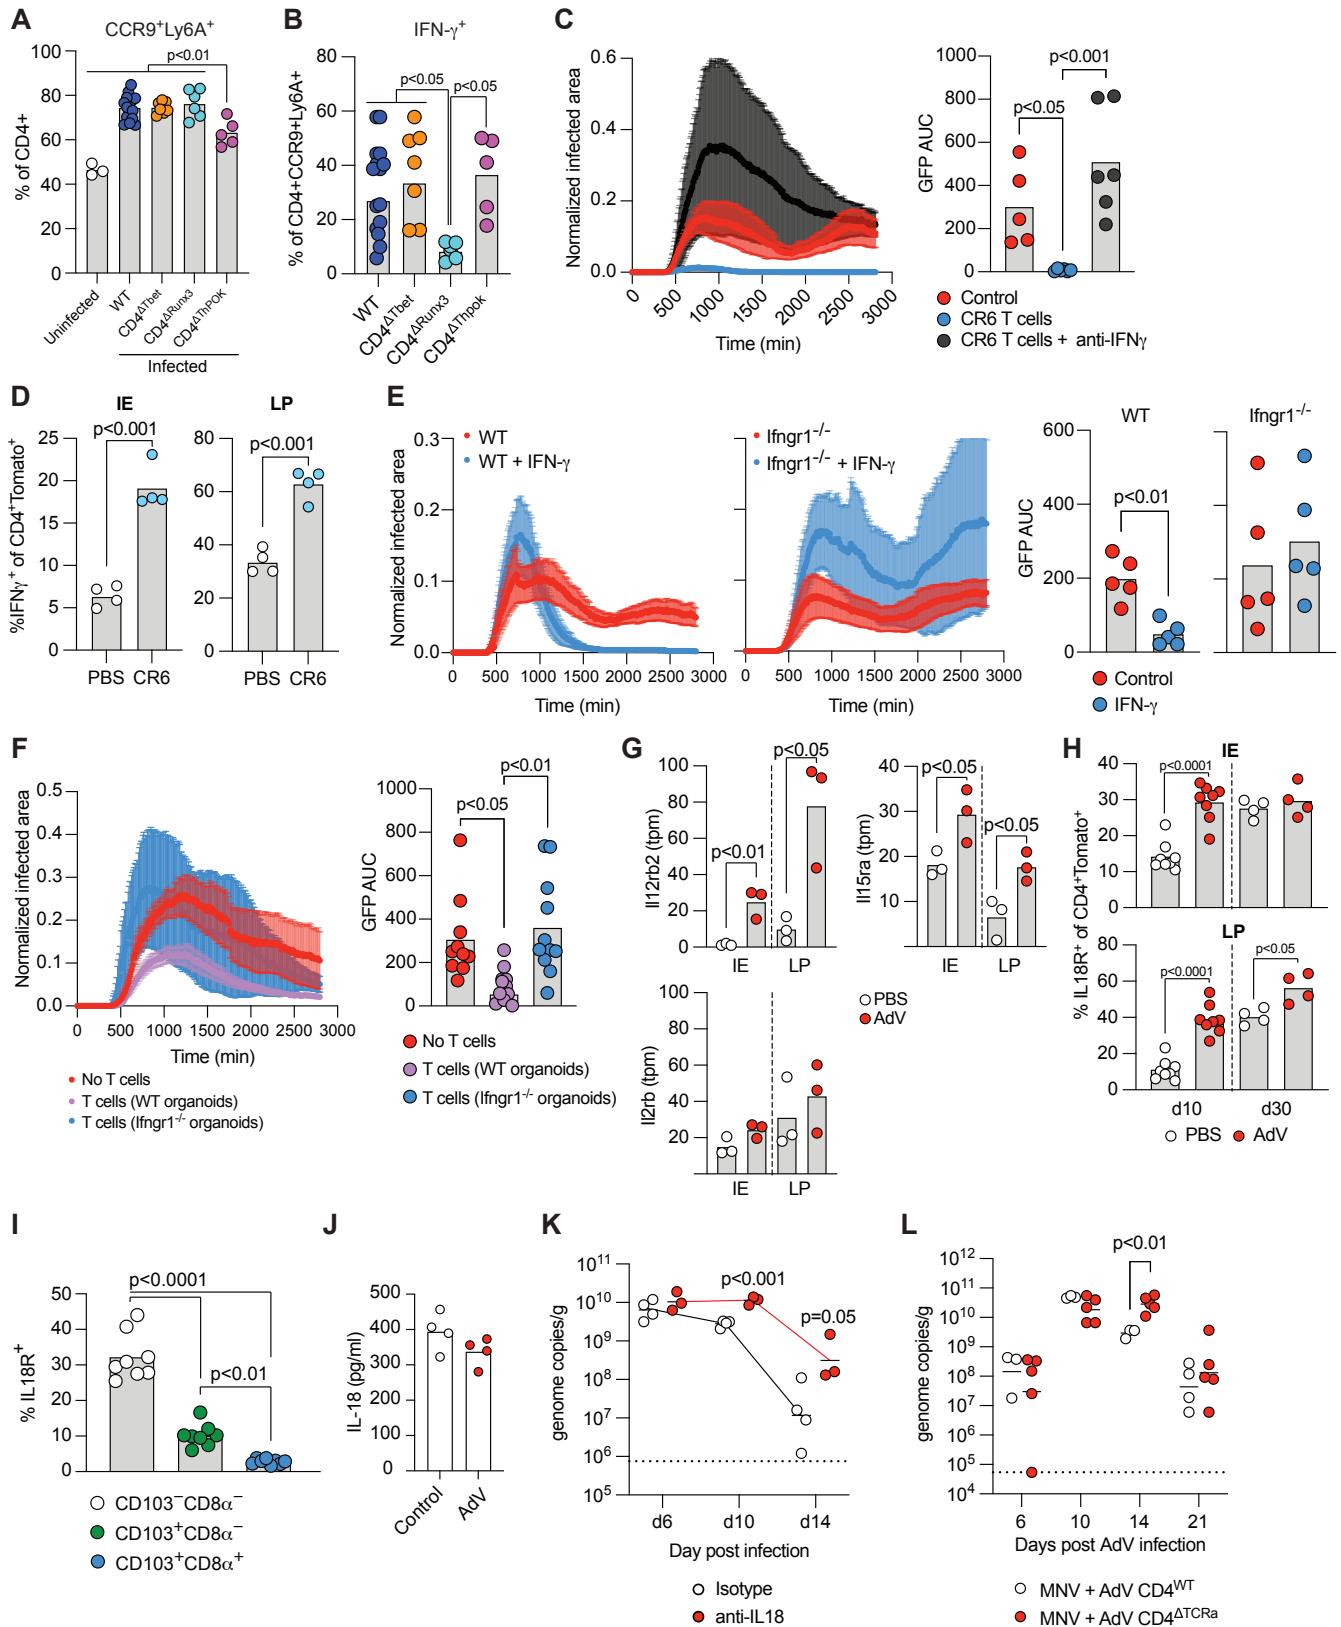

**Figure S5. (Related to Figure 7) Characterization of CCR9<sup>+</sup>Ly6A<sup>+</sup>CD4<sup>+</sup> T cells and functional analysis of IFN $\gamma$  and TCR $\alpha$  in AdV-recruited T cells. (A and B) Mice were infected with AdV and small intestine LP T cells were analyzed 10 days post infection. (A) Frequency of CCR9<sup>+</sup>Ly6A<sup>+</sup> cells among CD4<sup>+</sup> T cells. (B) IFN- $\gamma$  production among CCR9<sup>+</sup>Ly6A<sup>+</sup>CD4<sup>+</sup> T cells. (C) iSell<sup>Tomato</sup> mice were infected with CR6 and small intestine CD4<sup>+</sup>Tomato<sup>+</sup> T cells were sorted at day 10 post infection. T cells was co-cultured with AdV-GFP**

infected organoids and imaged with or without anti-IFN- $\gamma$  blocking antibodies. Normalized infected area over time imaged (left) and accumulated GFP levels (right) in indicated conditions. **(D)** iSell<sup>Tomato</sup> mice were orally infected with  $3 \times 10^6$  pfu of CR6, small intestine IE and LP CD4<sup>+</sup>CD62L<sup>-</sup>Tomato<sup>+</sup> T cells was analyzed for IFN- $\gamma$  production 10 days post infection **(E)** WT or *lfngr1*<sup>-/-</sup> organoids were infected with  $10^4$  i.u. of AdV-GFP and treated with or without 10 ng/ml of IFN- $\gamma$ . **(F)** iSell<sup>Tomato</sup> mice were infected with AdV and small intestine CD4<sup>+</sup>Tomato<sup>+</sup> T cells were sorted at day 10 post infection. T cells was co-cultured with AdV-GFP infected WT or *lfngr1*<sup>-/-</sup> organoids and imaged. Normalized infected area over time imaged (left) and accumulated GFP levels (right) in indicated conditions. **(G)** Quantification of the *l12rb2* and *l15ra* expression normalized by transcripts per million (tpm) of reads sequenced in CD4<sup>+</sup>Tomato<sup>+</sup> from AdV-infected mice 10 days post infection or PBS-treated control mice. **(H)** IL-18R expression was analyzed on TCRb<sup>+</sup>CD4<sup>+</sup>CD62L<sup>-</sup>Tomato<sup>+</sup> T cells in IE and LP 10 days post AdV infection. **(I)** IL-18R expression on CD103<sup>-</sup>CD8 $\alpha$ <sup>-</sup>, CD103<sup>+</sup>CD8 $\alpha$ <sup>-</sup> and CD103<sup>+</sup>CD8 $\alpha$ <sup>+</sup> IELs. **(J)** IL-18 was measured in control or AdV2 infected organoids 48 hours post infection. **(K)** AdV genome copies per gram of feces over time in mice treated with IL-18 blocking antibody or isotype control at day 9, 10, 11, 12, and 13 post infection. **(L)** Viral genome copies of AdV per gram of feces of AdV-infection over time of WT and iCD4<sup>ATCR $\alpha$</sup>  mice treated with tamoxifen at day 6 and 8 post MNV-CR6 infection. Data are expressed as mean of individual mice, except for C, E and F, data are expressed as mean of individual organoids. For A and B (n = 7-18, two independent experiments), for C (n = 5-6, one experiment), for D (n = 4, one experiment), for E (n = 5, one experiment), for F (n = 10-11, two independent experiments), for G (n = 3, one experiment), for H (d10, n = 8, two independent experiments; d30, n = 4, one experiment), and for I (n = 8, two independent experiments), for J (n = 4, two independent experiments), for K (n = 3-5, one experiment), for L (n = 3-5, one experiment). p values as indicated, Student's t-test D, E, G, H, K and L (log10 transformed). One-way ANOVA plus Bonferroni test in A, B, C, F, and I.

| <b>Table S1. Oligonucleotides for TCRseq (Related to Fig. 4)</b>   |                             |                     |
|--------------------------------------------------------------------|-----------------------------|---------------------|
| TRAV1 external forward 5'- GGTTATCCTGGTACCAGCA -3'                 | Integrated DNA Technologies | Bilate et al., 2020 |
| TRAV2 external forward 5'- CATCTACTGGTACCGACAGG -3'                | Integrated DNA Technologies | Bilate et al., 2020 |
| TRAV3 external forward 5'- GGCGAGCAGGTGGAG -3'                     | Integrated DNA Technologies | Bilate et al., 2020 |
| TRAV4 external forward 5'- TCTGSTCTGAGATGCAATTTT -3'               | Integrated DNA Technologies | Bilate et al., 2020 |
| TRAV5-1/5-4(D) external forward 5'- GGCTACTTCCCTTGGTATAAGCAAGA -3' | Integrated DNA Technologies | Bilate et al., 2020 |
| TRAV6-1/6-2 external forward 5'- CAGATGCAAGGTCAAGTGAC -3'          | Integrated DNA Technologies | Bilate et al., 2020 |
| TRAV6-3/6-4(D) external forward 5'- AAGGTCCACAGCTCCTTC -3'         | Integrated DNA Technologies | Bilate et al., 2020 |
| TRAV6-5/6-7(D) external forward 5'- GTTCTGGTATGTGCAGTATCC -3'      | Integrated DNA Technologies | Bilate et al., 2020 |
| TRAV6-6 external forward 5'- AGATTCCGTGACTCAAACAG -3'              | Integrated DNA Technologies | Bilate et al., 2020 |
| TRAV7 external forward 5'- AGAAGGTRCAGCAGAGCCCAGAATC -3'           | Integrated DNA Technologies | Bilate et al., 2020 |
| TRAV8 external forward 5'- GAGCRTCCASGAGGGTG -3'                   | Integrated DNA Technologies | Bilate et al., 2020 |
| TRAV9 external forward 5'- CCAGTGGTTCAAGGAGTG -3'                  | Integrated DNA Technologies | Bilate et al., 2020 |
| TRAV10/10a(D) external forward 5'- AGAGAAGGTCGAGCAACAC -3'         | Integrated DNA Technologies | Bilate et al., 2020 |
| TRAV11 external forward 5'- AAGACCCAAGTGGAGCAG -3'                 | Integrated DNA Technologies | Bilate et al., 2020 |
| TRAV12 external forward 5'- TGACCCAGACAGAAGGC -3'                  | Integrated DNA Technologies | Bilate et al., 2020 |
| TRAV13 external forward 5'- TCCTTGGTTCTGCAGG -3'                   | Integrated DNA Technologies | Bilate et al., 2020 |
| TRAV14 external forward 5'- GCAGCAGGTGAGACAAAG -3'                 | Integrated DNA Technologies | Bilate et al., 2020 |
| TRAV15 external forward 5'- CASCTTYTTAGTGGAGAGATGG -3'             | Integrated DNA Technologies | Bilate et al., 2020 |
| TRAV16 external forward 5'- GTACAAGCAAACAGCAAGTG -3'               | Integrated DNA Technologies | Bilate et al., 2020 |
| TRAV17 external forward 5'- CAGTCCGTGGACCAGC -3'                   | Integrated DNA Technologies | Bilate et al., 2020 |
| TRAV18 external forward 5'- AACGGCTGGAGCAGAG -3'                   | Integrated DNA Technologies | Bilate et al., 2020 |
| TRAV19 external forward 5'- GCAAGTTAAACAAAGCTCTCC -3'              | Integrated DNA Technologies | Bilate et al., 2020 |
| TRAV21 external forward 5'- GTGCACTTGCCTTGTAGC-3'                  | Integrated DNA Technologies | Bilate et al., 2020 |
| TRAC external reverse 5'- GGCATCACAGGGAACG -3'                     | Integrated DNA Technologies | Bilate et al., 2020 |
| TRBV1 external forward 5'- TACCACGTGGTCAAGCTG -3'                  | Integrated DNA Technologies | Bilate et al., 2020 |
| TRBV2 external forward 5'- CAGTATCTAGGCCACAATGC -3'                | Integrated DNA Technologies | Bilate et al., 2020 |
| TRBV3 external forward 5'- CCCAAAGTCTTACAGATCCC -3'                | Integrated DNA Technologies | Bilate et al., 2020 |

|                                                                           |                             |                     |
|---------------------------------------------------------------------------|-----------------------------|---------------------|
| TRBV4 external forward 5'- GACGGCTGTTTTCCAGAC -3'                         | Integrated DNA Technologies | Bilate et al., 2020 |
| TRBV5 external forward 5'- GGTATAAACAGAGCGCTGAG -3'                       | Integrated DNA Technologies | Bilate et al., 2020 |
| TRBV12 external forward 5'- GGGGTTGTCCAGTCTCC -3'                         | Integrated DNA Technologies | Bilate et al., 2020 |
| TRBV13 external forward 5'- GCTGCAGTCACCCAAAG -3'                         | Integrated DNA Technologies | Bilate et al., 2020 |
| TRBV14 external forward 5'- GCAGTCCTACAGGAAGGG -3'                        | Integrated DNA Technologies | Bilate et al., 2020 |
| TRBV15 external forward 5'- GAGTTACCCAGACACCCAG -3'                       | Integrated DNA Technologies | Bilate et al., 2020 |
| TRBV16 external forward 5'- CCTAGGCACAAGGTGACAG -3'                       | Integrated DNA Technologies | Bilate et al., 2020 |
| TRBV17external forward 5'- GAAGCCAAACCAAGCAC -3'                          | Integrated DNA Technologies | Bilate et al., 2020 |
| TRBV19 external forward 5'- GATTGGTCAGGAAGGGC -3'                         | Integrated DNA Technologies | Bilate et al., 2020 |
| TRBV20 external forward 5'- GGATGGAGTGTCAGGCTG -3'                        | Integrated DNA Technologies | Bilate et al., 2020 |
| TRBV23 external forward 5'- CTGCAGTTACACAGAAGCC -3'                       | Integrated DNA Technologies | Bilate et al., 2020 |
| TRBV24external forward 5'- CAGACTCCACGATACCTGG -3'                        | Integrated DNA Technologies | Bilate et al., 2020 |
| TRBV26 external forward 5'- GGTGAAAGGGCAAGGAC -3'                         | Integrated DNA Technologies | Bilate et al., 2020 |
| TRBV29 external forward 5'- GCTGGAATGTGGACAGG -3'                         | Integrated DNA Technologies | Bilate et al., 2020 |
| TRBV30 external forward 5'- CCTCCTCTACCAAAGCC -3'                         | Integrated DNA Technologies | Bilate et al., 2020 |
| TRBV31 external forward 5'- CTAACCTCTACTGGTACTGGCAG -3'                   | Integrated DNA Technologies | Bilate et al., 2020 |
| TRBC external reverse 5'- CCAGAAGGTAGCAGAGACCC -3'                        | Integrated DNA Technologies | Bilate et al., 2020 |
| TRBV1 internal forward 5'- CCAGGGTTTTCCCAGTCACGACGTATCCCTGGATGAGCTG -3'   | Integrated DNA Technologies | Bilate et al., 2020 |
| TRBV2 internal forward 5'- CCAGGGTTTTCCCAGTCACGACGGACAATCAGACTGCCTC -3'   | Integrated DNA Technologies | Bilate et al., 2020 |
| TRBV3 internal forward 5'- CCAGGGTTTTCCCAGTCACGACGATATGGGGCAGATGGTG -3'   | Integrated DNA Technologies | Bilate et al., 2020 |
| TRBV4 internal forward 5'- CCAGGGTTTTCCCAGTCACGACCAGGTGGGAAATGAAGTG -3'   | Integrated DNA Technologies | Bilate et al., 2020 |
| TRBV5 internal forward 5'- CCAGGGTTTTCCCAGTCACGACGCCAGAGCTCATGTTTC TC -3' | Integrated DNA Technologies | Bilate et al., 2020 |
| TRBV12 internal forward 5'- CCAGGGTTTTCCCAGTCACGACCCAGCAGATTCTCAGTCC -3'  | Integrated DNA Technologies | Bilate et al., 2020 |
| TRBV13 internal forward 5'- CCAGGGTTTTCCCAGTCACGACGTAAGTATCGGCAGGAC -3'   | Integrated DNA Technologies | Bilate et al., 2020 |
| TRBV14 internal forward 5'- CCAGGGTTTTCCCAGTCACGACGGTATCAGCAGCCAGAG -3'   | Integrated DNA Technologies | Bilate et al., 2020 |



|                                                                                              |                                |                     |
|----------------------------------------------------------------------------------------------|--------------------------------|---------------------|
| TRBV15 internal forward 5'-<br>CCAGGGTTTTCCCAGTCACGACGTGTGAGCCAGTTTCAG<br>G -3'              | Integrated DNA<br>Technologies | Bilate et al., 2020 |
| TRBV16 internal forward 5'-<br>CCAGGGTTTTCCCAGTCACGACGAAGCAACTCTGTGGTG<br>TG -3'             | Integrated DNA<br>Technologies | Bilate et al., 2020 |
| TRBV17 internal forward 5'-<br>CCAGGGTTTTCCCAGTCACGACGAACAGGGAAGCTGACA<br>C -3'              | Integrated DNA<br>Technologies | Bilate et al., 2020 |
| TRBV19 internal forward 5'-<br>CCAGGGTTTTCCCAGTCACGACGGTACCGACAGGATTCA<br>G -3'              | Integrated DNA<br>Technologies | Bilate et al., 2020 |
| TRBV20 internal forward 5'-<br>CCAGGGTTTTCCCAGTCACGACGCTTGGTATCGTCAATC<br>G -3'              | Integrated DNA<br>Technologies | Bilate et al., 2020 |
| TRBV23 internal forward 5'-<br>CCAGGGTTTTCCCAGTCACGACGCCAGGAAGCAGAGATG<br>-3'                | Integrated DNA<br>Technologies | Bilate et al., 2020 |
| TRBV24 internal forward 5'-<br>CCAGGGTTTTCCCAGTCACGACGCACACTGCCTTTTACT<br>GG -3'             | Integrated DNA<br>Technologies | Bilate et al., 2020 |
| TRBV26 internal forward 5'-<br>CCAGGGTTTTCCCAGTCACGACGAGGTGTATCCCTGAAA<br>AGG -3'            | Integrated DNA<br>Technologies | Bilate et al., 2020 |
| TRBV29 internal forward 5'-<br>CCAGGGTTTTCCCAGTCACGACGTACTGGTATCGACAAG<br>ACCC -3'           | Integrated DNA<br>Technologies | Bilate et al., 2020 |
| TRBV30 internal forward 5'-<br>CCAGGGTTTTCCCAGTCACGACGGACATCTGTCAAAGTG<br>GC -3'             | Integrated DNA<br>Technologies | Bilate et al., 2020 |
| TRBV31 internal forward 5'-<br>CCAGGGTTTTCCCAGTCACGACCTGTTGGCCAGGTAGAG<br>TC -3'             | Integrated DNA<br>Technologies | Bilate et al., 2020 |
| TRBC internal reverse 5'- GGGTAGCCTTTTGTGGTTTG -3'                                           | Integrated DNA<br>Technologies | Bilate et al., 2020 |
| TRAV1 internal forward 5'-<br>CCAGGGTTTTCCCAGTCACGACCTCCACATTCCTGAGCC<br>-3'                 | Integrated DNA<br>Technologies | Bilate et al., 2020 |
| TRAV2 internal forward 5'-<br>CCAGGGTTTTCCCAGTCACGACACTCTGAGCCTGCCCT -<br>3'                 | Integrated DNA<br>Technologies | Bilate et al., 2020 |
| TRAV3 internal forward 5'-<br>CCAGGGTTTTCCCAGTCACGACGCCCTCCTCACCTGAG -<br>3'                 | Integrated DNA<br>Technologies | Bilate et al., 2020 |
| TRAV4 internal forward 5'-<br>CCAGGGTTTTCCCAGTCACGACGGITIMAGGAACAAAGGA<br>GAAT -3'           | Integrated DNA<br>Technologies | Bilate et al., 2020 |
| TRAV5-1/5-4(D) internal forward 5'-<br>CCAGGGTTTTCCCAGTCACGACATYCGTTCAAATATGGAA<br>AGAAA -3' | Integrated DNA<br>Technologies | Bilate et al., 2020 |
| TRAV6-1/6-2 internal forward 5'-<br>CCAGGGTTTTCCCAGTCACGACGGAGAAGGTCCACAGCT<br>C -3'         | Integrated DNA<br>Technologies | Bilate et al., 2020 |
| TRAV6-3/6-4(D) internal forward 5'-<br>CCAGGGTTTTCCCAGTCACGACCAACTGCCAACAACAAG<br>G -3'      | Integrated DNA<br>Technologies | Bilate et al., 2020 |
| TRAV6-5/6-7(D) internal forward 5'-<br>CCAGGGTTTTCCCAGTCACGACTCCTTCCACTTGCAGAAA<br>G -3'     | Integrated DNA<br>Technologies | Bilate et al., 2020 |

|                                                                                                          |                             |                     |
|----------------------------------------------------------------------------------------------------------|-----------------------------|---------------------|
| TRAV6-6 internal forward 5'-<br>CCAGGGTTTTCCCAGTCACGACACGGCTGGCCAGAAG -3'                                | Integrated DNA Technologies | Bilate et al., 2020 |
| TRAV7 internal forward 5'-<br>CCAGGGTTTTCCCAGTCACGACCAKGRCYTCYYTCAACT<br>GCAC -3'                        | Integrated DNA Technologies | Bilate et al., 2020 |
| TRAV8 internal forward 5'-<br>CCAGGGTTTTCCCAGTCACGACAGAGCCACCCTTGACAC<br>-3'                             | Integrated DNA Technologies | Bilate et al., 2020 |
| TRAV9 internal forward 5'-<br>CCAGGGTTTTCCCAGTCACGACGCTTYGAGGCTGAGTTCA<br>G -3'                          | Integrated DNA Technologies | Bilate et al., 2020 |
| TRAV10/10a(D) internal forward 5'-<br>CCAGGGTTTTCCCAGTCACGACCTACACTGAGTGTTCTGA<br>GAGG -3'               | Integrated DNA Technologies | Bilate et al., 2020 |
| TRAV11 internal forward 5'-<br>CCAGGGTTTTCCCAGTCACGACAACAGGACACAGGCAAA<br>G -3'                          | Integrated DNA Technologies | Bilate et al., 2020 |
| TRAV12 internal forward 5'-<br>CCAGGGTTTTCCCAGTCACGACGGTTCCACGCCACTC -3'                                 | Integrated DNA Technologies | Bilate et al., 2020 |
| TRAV13 internal forward 5'-<br>CCAGGGTTTTCCCAGTCACGACTGCAGGAGGGGGAGA -<br>3'                             | Integrated DNA Technologies | Bilate et al., 2020 |
| TRAV14 internal forward 5'-<br>CCAGGGTTTTCCCAGTCACGACCTCTGACAGTCTGGGAA<br>GG -3'                         | Integrated DNA Technologies | Bilate et al., 2020 |
| TRAV15 internal forward 5'-<br>CCAGGGTTTTCCCAGTCACGACAYTCTGTAGTCTTCCAGA<br>AATCAC -3'                    | Integrated DNA Technologies | Bilate et al., 2020 |
| TRAV16 internal forward 5'-<br>CCAGGGTTTTCCCAGTCACGACATTATTCTCTGAACTTTC<br>AGAAGC -3'                    | Integrated DNA Technologies | Bilate et al., 2020 |
| TRAV17 internal forward 5'-<br>CCAGGGTTTTCCCAGTCACGACTATGAAGGAGCCTCCCT<br>G -3'                          | Integrated DNA Technologies | Bilate et al., 2020 |
| TRAV18 internal forward 5'-<br>CCAGGGTTTTCCCAGTCACGACCAAGATTTACCCGCAG<br>-3'                             | Integrated DNA Technologies | Bilate et al., 2020 |
| TRAV19 internal forward 5'-<br>CCAGGGTTTTCCCAGTCACGACGCTGACTGTTCAAGAGG<br>GA -3'                         | Integrated DNA Technologies | Bilate et al., 2020 |
| TRAV21 internal forward 5'-<br>CCAGGGTTTTCCCAGTCACGACAATAGTATGGCTTTCCTG<br>GC -3'                        | Integrated DNA Technologies | Bilate et al., 2020 |
| TRAC internal reverse 5'- GCACATTGATTTGGGAGTC -3'                                                        | Integrated DNA Technologies | Bilate et al., 2020 |
| commonseq+column barcode+TRAC internal_1 5'-<br>CTGCTGAACCGCTCTTCCGATCTNNGTTCATGCTGTCCTG<br>AGACCGAG -3' | Integrated DNA Technologies | Bilate et al., 2020 |
| commonseq+column barcode+TRAC internal_2 5'-<br>CTGCTGAACCGCTCTTCCGATCTNACAGGATGCTGTCCT<br>GAGACCGAG -3' | Integrated DNA Technologies | Bilate et al., 2020 |
| commonseq+column barcode+TRAC internal_3 5'-<br>CTGCTGAACCGCTCTTCCGATCTNNTTATATGCTGTCCTG<br>AGACCGAG -3' | Integrated DNA Technologies | Bilate et al., 2020 |
| commonseq+column barcode+TRAC internal_4 5'-<br>CTGCTGAACCGCTCTTCCGATCTNCCCTGTTGCTGTCCT<br>GAGACCGAG -3' | Integrated DNA Technologies | Bilate et al., 2020 |
| commonseq+column barcode+TRAC internal_5 5'-<br>CTGCTGAACCGCTCTTCCGATCTNACCGCTGCTGTCCT<br>GAGACCGAG -3'  | Integrated DNA Technologies | Bilate et al., 2020 |

|                                                                                                             |                                |                     |
|-------------------------------------------------------------------------------------------------------------|--------------------------------|---------------------|
| commonseq+column barcode+TRAC internal_6 5'-<br>CTGCTGAACCGCTCTTCCGATCTNNACTTATGCTGTCCTG<br>AGACCGAG -3'    | Integrated DNA<br>Technologies | Bilate et al., 2020 |
| commonseq+column barcode+TRAC internal_7 5'-<br>CTGCTGAACCGCTCTTCCGATCTNNGCTAGTGCTGTCCT<br>GAGACCGAG -3'    | Integrated DNA<br>Technologies | Bilate et al., 2020 |
| commonseq+column barcode+TRAC internal_8 5'-<br>CTGCTGAACCGCTCTTCCGATCTNNGACGTTGCTGTCCT<br>GAGACCGAG -3'    | Integrated DNA<br>Technologies | Bilate et al., 2020 |
| commonseq+column barcode+TRAC internal_9 5'-<br>CTGCTGAACCGCTCTTCCGATCTNNGGCTATGCTGTCCT<br>GAGACCGAG -3'    | Integrated DNA<br>Technologies | Bilate et al., 2020 |
| commonseq+column barcode+TRAC internal_10 5'-<br>CTGCTGAACCGCTCTTCCGATCTNNGAATGTGCTGTCCT<br>GAGACCGAG -3'   | Integrated DNA<br>Technologies | Bilate et al., 2020 |
| commonseq+column barcode+TRAC internal_11 5'-<br>CTGCTGAACCGCTCTTCCGATCTNCCAAGTCTGTCCT<br>GAGACCGAG -3'     | Integrated DNA<br>Technologies | Bilate et al., 2020 |
| commonseq+column barcode+TRAC internal_12 5'-<br>CTGCTGAACCGCTCTTCCGATCTNNGAGACTGCTGTCCT<br>GAGACCGAG -3'   | Integrated DNA<br>Technologies | Bilate et al., 2020 |
| commonseq+column barcode+TRBC internal_1 5'-<br>CTGCTGAACCGCTCTTCCGATCTNNGTTCCTCAAACAAG<br>GAGACCTTGG -3'   | Integrated DNA<br>Technologies | Bilate et al., 2020 |
| commonseq+column barcode+TRBC internal_2 5'-<br>CTGCTGAACCGCTCTTCCGATCTNCAAGACTCAAACAA<br>GGAGACCTTGG -3'   | Integrated DNA<br>Technologies | Bilate et al., 2020 |
| commonseq+column barcode+TRBC internal_3 5'-<br>CTGCTGAACCGCTCTTCCGATCTNNTTATACTCAAACAAG<br>GAGACCTTGG -3'  | Integrated DNA<br>Technologies | Bilate et al., 2020 |
| commonseq+column barcode+TRBC internal_4 5'-<br>CTGCTGAACCGCTCTTCCGATCTNCCCTGTCTCAAACAAG<br>GAGACCTTGG -3'  | Integrated DNA<br>Technologies | Bilate et al., 2020 |
| commonseq+column barcode+TRBC internal_5 5'-<br>CTGCTGAACCGCTCTTCCGATCTNACCGCCTCAAACAA<br>GGAGACCTTGG -3'   | Integrated DNA<br>Technologies | Bilate et al., 2020 |
| commonseq+column barcode+TRBC internal_6 5'-<br>CTGCTGAACCGCTCTTCCGATCTNNACTTACTCAAACAAG<br>GAGACCTTGG -3'  | Integrated DNA<br>Technologies | Bilate et al., 2020 |
| commonseq+column barcode+TRBC internal_7 5'-<br>CTGCTGAACCGCTCTTCCGATCTNNGCTAGCTCAAACAA<br>GGAGACCTTGG -3'  | Integrated DNA<br>Technologies | Bilate et al., 2020 |
| commonseq+column barcode+TRBC internal_8 5'-<br>CTGCTGAACCGCTCTTCCGATCTNNGACGTCTCAAACAA<br>GGAGACCTTGG -3'  | Integrated DNA<br>Technologies | Bilate et al., 2020 |
| commonseq+column barcode+TRBC internal_9 5'-<br>CTGCTGAACCGCTCTTCCGATCTNNGGCTACTCAAACAA<br>GGAGACCTTGG -3'  | Integrated DNA<br>Technologies | Bilate et al., 2020 |
| commonseq+column barcode+TRBC internal_10 5'-<br>CTGCTGAACCGCTCTTCCGATCTNNGAATGCTCAAACAA<br>GGAGACCTTGG -3' | Integrated DNA<br>Technologies | Bilate et al., 2020 |
| commonseq+column barcode+TRBC internal_11 5'-<br>CTGCTGAACCGCTCTTCCGATCTNCCAACCTCAAACAA<br>GGAGACCTTGG -3'  | Integrated DNA<br>Technologies | Bilate et al., 2020 |
| commonseq+column barcode+TRBC internal_12 5'-<br>CTGCTGAACCGCTCTTCCGATCTNNGAGACCTCAAACAA<br>GGAGACCTTGG -3' | Integrated DNA<br>Technologies | Bilate et al., 2020 |
| P1RA_forward 5'-<br>CCTACACGACGCTCTTCCGATCTNNGCAGAGATAAGCCC<br>AGGGTTTTCCAGTCACGAC -3'                      | Integrated DNA<br>Technologies | Bilate et al., 2020 |

|                                                                                           |                                |                     |
|-------------------------------------------------------------------------------------------|--------------------------------|---------------------|
| P2RA_forward 5'-<br>CCTACACGACGCTCTTCCGATCTNNTCGAAGATAAGCCC<br>AGGGTTTTCCCAGTCACGAC -3'   | Integrated DNA<br>Technologies | Bilate et al., 2020 |
| P3RA_forward 5'-<br>CCTACACGACGCTCTTCCGATCTNNAACAAGATAAGCCC<br>AGGGTTTTCCCAGTCACGAC -3'   | Integrated DNA<br>Technologies | Bilate et al., 2020 |
| P4RA_forward 5'-<br>CCTACACGACGCTCTTCCGATCTNNGGTGCGATAAGCCC<br>AGGGTTTTCCCAGTCACGAC -3'   | Integrated DNA<br>Technologies | Bilate et al., 2020 |
| P5RA_forward 5'-<br>CCTACACGACGCTCTTCCGATCTNNTTGGTGATAAGCCC<br>AGGGTTTTCCCAGTCACGAC -3'   | Integrated DNA<br>Technologies | Bilate et al., 2020 |
| P6RA_forward 5'-<br>CCTACACGACGCTCTTCCGATCTNNCATTGATAAGCCCA<br>GGGTTTTCCCAGTCACGAC -3'    | Integrated DNA<br>Technologies | Bilate et al., 2020 |
| P7RA_forward 5'-<br>CCTACACGACGCTCTTCCGATCTNNATTGGGATAAGCCC<br>AGGGTTTTCCCAGTCACGAC -3'   | Integrated DNA<br>Technologies | Bilate et al., 2020 |
| P8RA_forward 5'-<br>CCTACACGACGCTCTTCCGATCTNCGGTTGATAAGCCC<br>AGGGTTTTCCCAGTCACGAC -3'    | Integrated DNA<br>Technologies | Bilate et al., 2020 |
| P9RA_forward 5'-<br>CCTACACGACGCTCTTCCGATCTNNATCCTGATAAGCCCA<br>GGGTTTTCCCAGTCACGAC -3'   | Integrated DNA<br>Technologies | Bilate et al., 2020 |
| P10RA_forward 5'-<br>CCTACACGACGCTCTTCCGATCTNNATGTGCGATAAGCCC<br>AGGGTTTTCCCAGTCACGAC -3' | Integrated DNA<br>Technologies | Bilate et al., 2020 |
| P11RA_forward 5'-<br>CCTACACGACGCTCTTCCGATCTNNTCACGGATAAGCCC<br>AGGGTTTTCCCAGTCACGAC -3'  | Integrated DNA<br>Technologies | Bilate et al., 2020 |
| P12RA_forward 5'-<br>CCTACACGACGCTCTTCCGATCTNNAGACCGATAAGCCC<br>AGGGTTTTCCCAGTCACGAC -3'  | Integrated DNA<br>Technologies | Bilate et al., 2020 |
| P1RB_forward 5'-<br>CCTACACGACGCTCTTCCGATCTNNGCAGAGATGCACCC<br>AGGGTTTTCCCAGTCACGAC -3'   | Integrated DNA<br>Technologies | Bilate et al., 2020 |
| P2RB_forward 5'-<br>CCTACACGACGCTCTTCCGATCTNNTCGAAGATGCACCC<br>AGGGTTTTCCCAGTCACGAC -3'   | Integrated DNA<br>Technologies | Bilate et al., 2020 |
| P3RB_forward 5'-<br>CCTACACGACGCTCTTCCGATCTNNAACAAGATGCACCC<br>AGGGTTTTCCCAGTCACGAC -3'   | Integrated DNA<br>Technologies | Bilate et al., 2020 |
| P4RB_forward 5'-<br>CCTACACGACGCTCTTCCGATCTNNGGTGCGATGCACCC<br>AGGGTTTTCCCAGTCACGAC -3'   | Integrated DNA<br>Technologies | Bilate et al., 2020 |
| P5RB_forward 5'-<br>CCTACACGACGCTCTTCCGATCTNNTTGGTGATGCACCC<br>AGGGTTTTCCCAGTCACGAC -3'   | Integrated DNA<br>Technologies | Bilate et al., 2020 |
| P6RB_forward 5'-<br>CCTACACGACGCTCTTCCGATCTNNCATTGATGCACCC<br>AGGGTTTTCCCAGTCACGAC -3'    | Integrated DNA<br>Technologies | Bilate et al., 2020 |
| P7RB_forward 5'-<br>CCTACACGACGCTCTTCCGATCTNNATTGGGATGCACCC<br>AGGGTTTTCCCAGTCACGAC -3'   | Integrated DNA<br>Technologies | Bilate et al., 2020 |
| P8RB_forward 5'-<br>CCTACACGACGCTCTTCCGATCTNCGGTTGATGCACCC<br>AGGGTTTTCCCAGTCACGAC -3'    | Integrated DNA<br>Technologies | Bilate et al., 2020 |
| P9RB_forward 5'-<br>CCTACACGACGCTCTTCCGATCTNNATCCTGATGCACCC<br>AGGGTTTTCCCAGTCACGAC -3'   | Integrated DNA<br>Technologies | Bilate et al., 2020 |

|                                                                                           |                                |                     |
|-------------------------------------------------------------------------------------------|--------------------------------|---------------------|
| P10RB_forward 5'-<br>CCTACACGACGCTCTTCCGATCTNNATGTGCGATGCACCC<br>AGGGTTTTCCCAGTCACGAC -3' | Integrated DNA<br>Technologies | Bilate et al., 2020 |
| P11RB_forward 5'-<br>CCTACACGACGCTCTTCCGATCTNNTCACGGATGCACCC<br>AGGGTTTTCCCAGTCACGAC -3'  | Integrated DNA<br>Technologies | Bilate et al., 2020 |
| P12RB_forward 5'-<br>CCTACACGACGCTCTTCCGATCTNAGACCGATGCACCC<br>AGGGTTTTCCCAGTCACGAC -3'   | Integrated DNA<br>Technologies | Bilate et al., 2020 |
| P1RC_forward 5'-<br>CCTACACGACGCTCTTCCGATCTNNGCAGAGACTCAGCC<br>AGGGTTTTCCCAGTCACGAC -3'   | Integrated DNA<br>Technologies | Bilate et al., 2020 |
| P2RC_forward 5'-<br>CCTACACGACGCTCTTCCGATCTNNTCGAAGACTCAGCC<br>AGGGTTTTCCCAGTCACGAC -3'   | Integrated DNA<br>Technologies | Bilate et al., 2020 |
| P3RC_forward 5'-<br>CCTACACGACGCTCTTCCGATCTNNAACAAGACTCAGCC<br>AGGGTTTTCCCAGTCACGAC -3'   | Integrated DNA<br>Technologies | Bilate et al., 2020 |
| P4RC_forward 5'-<br>CCTACACGACGCTCTTCCGATCTNNGGTGCGACTCAGCC<br>AGGGTTTTCCCAGTCACGAC -3'   | Integrated DNA<br>Technologies | Bilate et al., 2020 |
| P5RC_forward 5'-<br>CCTACACGACGCTCTTCCGATCTNNTTGGTGACTCAGCC<br>AGGGTTTTCCCAGTCACGAC -3'   | Integrated DNA<br>Technologies | Bilate et al., 2020 |
| P6RC_forward 5'-<br>CCTACACGACGCTCTTCCGATCTNNCATTGACTCAGCC<br>AGGGTTTTCCCAGTCACGAC -3'    | Integrated DNA<br>Technologies | Bilate et al., 2020 |
| P7RC_forward 5'-<br>CCTACACGACGCTCTTCCGATCTNNATTGGGACTCAGCC<br>AGGGTTTTCCCAGTCACGAC -3'   | Integrated DNA<br>Technologies | Bilate et al., 2020 |
| P8RC_forward 5'-<br>CCTACACGACGCTCTTCCGATCTNNCGGTTGACTCAGCC<br>AGGGTTTTCCCAGTCACGAC -3'   | Integrated DNA<br>Technologies | Bilate et al., 2020 |
| P9RC_forward 5'-<br>CCTACACGACGCTCTTCCGATCTNNATCCTGACTCAGCC<br>AGGGTTTTCCCAGTCACGAC -3'   | Integrated DNA<br>Technologies | Bilate et al., 2020 |
| P10RC_forward 5'-<br>CCTACACGACGCTCTTCCGATCTNNATGTGCGACTCAGCC<br>AGGGTTTTCCCAGTCACGAC -3' | Integrated DNA<br>Technologies | Bilate et al., 2020 |
| P11RC_forward 5'-<br>CCTACACGACGCTCTTCCGATCTNNTCACGGACTCAGCC<br>AGGGTTTTCCCAGTCACGAC -3'  | Integrated DNA<br>Technologies | Bilate et al., 2020 |
| P12RC_forward 5'-<br>CCTACACGACGCTCTTCCGATCTNAGACCGACTCAGCC<br>AGGGTTTTCCCAGTCACGAC -3'   | Integrated DNA<br>Technologies | Bilate et al., 2020 |
| P1RD_forward 5'-<br>CCTACACGACGCTCTTCCGATCTNNGCAGAGAGGAATCC<br>AGGGTTTTCCCAGTCACGAC -3'   | Integrated DNA<br>Technologies | Bilate et al., 2020 |
| P2RD_forward 5'-<br>CCTACACGACGCTCTTCCGATCTNNTCGAAGAGGAATCC<br>AGGGTTTTCCCAGTCACGAC -3'   | Integrated DNA<br>Technologies | Bilate et al., 2020 |
| P3RD_forward 5'-<br>CCTACACGACGCTCTTCCGATCTNNAACAAGAGGAATCC<br>AGGGTTTTCCCAGTCACGAC -3'   | Integrated DNA<br>Technologies | Bilate et al., 2020 |
| P4RD_forward 5'-<br>CCTACACGACGCTCTTCCGATCTNNGGTGCGAGGAATCC<br>AGGGTTTTCCCAGTCACGAC -3'   | Integrated DNA<br>Technologies | Bilate et al., 2020 |
| P5RD_forward 5'-<br>CCTACACGACGCTCTTCCGATCTNNTTGGTGAGGAATCC<br>AGGGTTTTCCCAGTCACGAC -3'   | Integrated DNA<br>Technologies | Bilate et al., 2020 |

|                                                                                           |                                |                     |
|-------------------------------------------------------------------------------------------|--------------------------------|---------------------|
| P6RD_forward 5'-<br>CCTACACGACGCTCTTCCGATCTNNCATTGAGGAATCC<br>AGGGTTTTCCCAGTCACGAC -3'    | Integrated DNA<br>Technologies | Bilate et al., 2020 |
| P7RD_forward 5'-<br>CCTACACGACGCTCTTCCGATCTNNATTGGGAGGAATCC<br>AGGGTTTTCCCAGTCACGAC -3'   | Integrated DNA<br>Technologies | Bilate et al., 2020 |
| P8RD_forward 5'-<br>CCTACACGACGCTCTTCCGATCTNNCGGTTGAGGAATCC<br>AGGGTTTTCCCAGTCACGAC -3'   | Integrated DNA<br>Technologies | Bilate et al., 2020 |
| P9RD_forward 5'-<br>CCTACACGACGCTCTTCCGATCTNNATCCTGAGGAATCC<br>AGGGTTTTCCCAGTCACGAC -3'   | Integrated DNA<br>Technologies | Bilate et al., 2020 |
| P10RD_forward 5'-<br>CCTACACGACGCTCTTCCGATCTNNATGTGCGAGGAATCC<br>AGGGTTTTCCCAGTCACGAC -3' | Integrated DNA<br>Technologies | Bilate et al., 2020 |
| P11RD_forward 5'-<br>CCTACACGACGCTCTTCCGATCTNNTCACGGAGGAATCC<br>AGGGTTTTCCCAGTCACGAC -3'  | Integrated DNA<br>Technologies | Bilate et al., 2020 |
| P12RD_forward 5'-<br>CCTACACGACGCTCTTCCGATCTNNAGACCGAGGAATCC<br>AGGGTTTTCCCAGTCACGAC -3'  | Integrated DNA<br>Technologies | Bilate et al., 2020 |
| P1RE_forward 5'-<br>CCTACACGACGCTCTTCCGATCTNNGCAGAGACGAGGCC<br>AGGGTTTTCCCAGTCACGAC -3'   | Integrated DNA<br>Technologies | Bilate et al., 2020 |
| P2RE_forward 5'-<br>CCTACACGACGCTCTTCCGATCTNNTCGAAGACGAGGCC<br>AGGGTTTTCCCAGTCACGAC -3'   | Integrated DNA<br>Technologies | Bilate et al., 2020 |
| P3RE_forward 5'-<br>CCTACACGACGCTCTTCCGATCTNNAACAAGACGAGGCC<br>AGGGTTTTCCCAGTCACGAC -3'   | Integrated DNA<br>Technologies | Bilate et al., 2020 |
| P4RE_forward 5'-<br>CCTACACGACGCTCTTCCGATCTNNGGTGCGACGAGGCC<br>AGGGTTTTCCCAGTCACGAC -3'   | Integrated DNA<br>Technologies | Bilate et al., 2020 |
| P5RE_forward 5'-<br>CCTACACGACGCTCTTCCGATCTNNTTGGTGACGAGGCC<br>AGGGTTTTCCCAGTCACGAC -3'   | Integrated DNA<br>Technologies | Bilate et al., 2020 |
| P6RE_forward 5'-<br>CCTACACGACGCTCTTCCGATCTNNCATTGACGAGGCC<br>AGGGTTTTCCCAGTCACGAC -3'    | Integrated DNA<br>Technologies | Bilate et al., 2020 |
| P7RE_forward 5'-<br>CCTACACGACGCTCTTCCGATCTNNATTGGGACGAGGCC<br>AGGGTTTTCCCAGTCACGAC -3'   | Integrated DNA<br>Technologies | Bilate et al., 2020 |
| P8RE_forward 5'-<br>CCTACACGACGCTCTTCCGATCTNNCGGTTGACGAGGCC<br>AGGGTTTTCCCAGTCACGAC -3'   | Integrated DNA<br>Technologies | Bilate et al., 2020 |
| P9RE_forward 5'-<br>CCTACACGACGCTCTTCCGATCTNNATCCTGACGAGGCC<br>AGGGTTTTCCCAGTCACGAC -3'   | Integrated DNA<br>Technologies | Bilate et al., 2020 |
| P10RE_forward 5'-<br>CCTACACGACGCTCTTCCGATCTNNATGTGCGACGAGGCC<br>AGGGTTTTCCCAGTCACGAC -3' | Integrated DNA<br>Technologies | Bilate et al., 2020 |
| P11RE_forward 5'-<br>CCTACACGACGCTCTTCCGATCTNNTCACGGACGAGGCC<br>AGGGTTTTCCCAGTCACGAC -3'  | Integrated DNA<br>Technologies | Bilate et al., 2020 |
| P12RE_forward 5'-<br>CCTACACGACGCTCTTCCGATCTNNAGACCGACGAGGCC<br>AGGGTTTTCCCAGTCACGAC -3'  | Integrated DNA<br>Technologies | Bilate et al., 2020 |
| P1RF_forward 5'-<br>CCTACACGACGCTCTTCCGATCTNNGCAGAGAAGGAGGCC<br>AGGGTTTTCCCAGTCACGAC -3'  | Integrated DNA<br>Technologies | Bilate et al., 2020 |

|                                                                                          |                                |                     |
|------------------------------------------------------------------------------------------|--------------------------------|---------------------|
| P2RF_forward 5'-<br>CCTACACGACGCTCTTCCGATCTNNTCGAAGAAGGAGCC<br>AGGGTTTTCCCAGTCACGAC -3'  | Integrated DNA<br>Technologies | Bilate et al., 2020 |
| P3RF_forward 5'-<br>CCTACACGACGCTCTTCCGATCTNNAACAAGAAGGAGCC<br>AGGGTTTTCCCAGTCACGAC -3'  | Integrated DNA<br>Technologies | Bilate et al., 2020 |
| P4RF_forward 5'-<br>CCTACACGACGCTCTTCCGATCTNNGGTGCGAAGGAGCC<br>AGGGTTTTCCCAGTCACGAC -3'  | Integrated DNA<br>Technologies | Bilate et al., 2020 |
| P5RF_forward 5'-<br>CCTACACGACGCTCTTCCGATCTNNTTGGTGAAGGAGCC<br>AGGGTTTTCCCAGTCACGAC -3'  | Integrated DNA<br>Technologies | Bilate et al., 2020 |
| P6RF_forward 5'-<br>CCTACACGACGCTCTTCCGATCTNNCATTGGAAGGAGCC<br>AGGGTTTTCCCAGTCACGAC -3'  | Integrated DNA<br>Technologies | Bilate et al., 2020 |
| P7RF_forward 5'-<br>CCTACACGACGCTCTTCCGATCTNNATTGGGAAGGAGCC<br>AGGGTTTTCCCAGTCACGAC -3'  | Integrated DNA<br>Technologies | Bilate et al., 2020 |
| P8RF_forward 5'-<br>CCTACACGACGCTCTTCCGATCTNCGGTTGAAGGAGCC<br>AGGGTTTTCCCAGTCACGAC -3'   | Integrated DNA<br>Technologies | Bilate et al., 2020 |
| P9RF_forward 5'-<br>CCTACACGACGCTCTTCCGATCTNNATCCTGAAGGAGCC<br>AGGGTTTTCCCAGTCACGAC -3'  | Integrated DNA<br>Technologies | Bilate et al., 2020 |
| P10RF_forward 5'-<br>CCTACACGACGCTCTTCCGATCTNNATGTGGAAGGAGCC<br>AGGGTTTTCCCAGTCACGAC -3' | Integrated DNA<br>Technologies | Bilate et al., 2020 |
| P11RF_forward 5'-<br>CCTACACGACGCTCTTCCGATCTNNTCACGGAAGGAGCC<br>AGGGTTTTCCCAGTCACGAC -3' | Integrated DNA<br>Technologies | Bilate et al., 2020 |
| P12RF_forward 5'-<br>CCTACACGACGCTCTTCCGATCTNNAGACCGAAGGAGCC<br>AGGGTTTTCCCAGTCACGAC -3' | Integrated DNA<br>Technologies | Bilate et al., 2020 |
| P1RG_forward 5'-<br>CCTACACGACGCTCTTCCGATCTNNGCAGAGATGTTGCC<br>AGGGTTTTCCCAGTCACGAC -3'  | Integrated DNA<br>Technologies | Bilate et al., 2020 |
| P2RG_forward 5'-<br>CCTACACGACGCTCTTCCGATCTNNTCGAAGATGTTGCC<br>AGGGTTTTCCCAGTCACGAC -3'  | Integrated DNA<br>Technologies | Bilate et al., 2020 |
| P3RG_forward 5'-<br>CCTACACGACGCTCTTCCGATCTNNAACAAGATGTTGCCA<br>GGGTTTTCCCAGTCACGAC -3'  | Integrated DNA<br>Technologies | Bilate et al., 2020 |
| P4RG_forward 5'-<br>CCTACACGACGCTCTTCCGATCTNNGGTGCGATGTTGCC<br>AGGGTTTTCCCAGTCACGAC -3'  | Integrated DNA<br>Technologies | Bilate et al., 2020 |
| P5RG_forward 5'-<br>CCTACACGACGCTCTTCCGATCTNNTTGGTGATGTTGCCA<br>GGGTTTTCCCAGTCACGAC -3'  | Integrated DNA<br>Technologies | Bilate et al., 2020 |
| P6RG_forward 5'-<br>CCTACACGACGCTCTTCCGATCTNNCATTGATGTTGCCA<br>GGGTTTTCCCAGTCACGAC -3'   | Integrated DNA<br>Technologies | Bilate et al., 2020 |
| P7RG_forward 5'-<br>CCTACACGACGCTCTTCCGATCTNNATTGGGATGTTGCC<br>AGGGTTTTCCCAGTCACGAC -3'  | Integrated DNA<br>Technologies | Bilate et al., 2020 |
| P8RG_forward 5'-<br>CCTACACGACGCTCTTCCGATCTNCGGTTGATGTTGCC<br>AGGGTTTTCCCAGTCACGAC -3'   | Integrated DNA<br>Technologies | Bilate et al., 2020 |
| P9RG_forward 5'-<br>CCTACACGACGCTCTTCCGATCTNNATCCTGATGTTGCCA<br>GGGTTTTCCCAGTCACGAC -3'  | Integrated DNA<br>Technologies | Bilate et al., 2020 |

|                                                                                           |                                |                     |
|-------------------------------------------------------------------------------------------|--------------------------------|---------------------|
| P10RG_forward 5'-<br>CCTACACGACGCTCTTCCGATCTNNATGTGCGATGTTGCCA<br>GGGTTTTCCCAGTCACGAC -3' | Integrated DNA<br>Technologies | Bilate et al., 2020 |
| P11RG_forward 5'-<br>CCTACACGACGCTCTTCCGATCTNNTCACGGATGTTGCC<br>AGGGTTTTCCCAGTCACGAC -3'  | Integrated DNA<br>Technologies | Bilate et al., 2020 |
| P12RG_forward 5'-<br>CCTACACGACGCTCTTCCGATCTNAGACCGATGTTGCC<br>AGGGTTTTCCCAGTCACGAC -3'   | Integrated DNA<br>Technologies | Bilate et al., 2020 |
| P1RH_forward 5'-<br>CCTACACGACGCTCTTCCGATCTNNGCAGAGACAACTCC<br>AGGGTTTTCCCAGTCACGAC -3'   | Integrated DNA<br>Technologies | Bilate et al., 2020 |
| P2RH_forward 5'-<br>CCTACACGACGCTCTTCCGATCTNNTCGAAGACAACTCC<br>AGGGTTTTCCCAGTCACGAC -3'   | Integrated DNA<br>Technologies | Bilate et al., 2020 |
| P3RH_forward 5'-<br>CCTACACGACGCTCTTCCGATCTNNAACAAGACAACTCCA<br>GGGTTTTCCCAGTCACGAC -3'   | Integrated DNA<br>Technologies | Bilate et al., 2020 |
| P4RH_forward 5'-<br>CCTACACGACGCTCTTCCGATCTNNGGTGCGACAACTCC<br>AGGGTTTTCCCAGTCACGAC -3'   | Integrated DNA<br>Technologies | Bilate et al., 2020 |
| P5RH_forward 5'-<br>CCTACACGACGCTCTTCCGATCTNNTTGGTGACAACTCCA<br>GGGTTTTCCCAGTCACGAC -3'   | Integrated DNA<br>Technologies | Bilate et al., 2020 |
| P6RH_forward 5'-<br>CCTACACGACGCTCTTCCGATCTNNCATTGACAACTCCA<br>GGGTTTTCCCAGTCACGAC -3'    | Integrated DNA<br>Technologies | Bilate et al., 2020 |
| P7RH_forward 5'-<br>CCTACACGACGCTCTTCCGATCTNNATTGGGACAACTCC<br>AGGGTTTTCCCAGTCACGAC -3'   | Integrated DNA<br>Technologies | Bilate et al., 2020 |
| P8RH_forward 5'-<br>CCTACACGACGCTCTTCCGATCTNCGGTTGACAACTCC<br>AGGGTTTTCCCAGTCACGAC -3'    | Integrated DNA<br>Technologies | Bilate et al., 2020 |
| P9RH_forward 5'-<br>CCTACACGACGCTCTTCCGATCTNNATCCTGACAACTCCA<br>GGGTTTTCCCAGTCACGAC -3'   | Integrated DNA<br>Technologies | Bilate et al., 2020 |
| P10RH_forward 5'-<br>CCTACACGACGCTCTTCCGATCTNNATGTGCGACAACTCCA<br>GGGTTTTCCCAGTCACGAC -3' | Integrated DNA<br>Technologies | Bilate et al., 2020 |
| P11RH_forward 5'-<br>CCTACACGACGCTCTTCCGATCTNNTCACGGACAACTCC<br>AGGGTTTTCCCAGTCACGAC -3'  | Integrated DNA<br>Technologies | Bilate et al., 2020 |
| P12RH_forward 5'-<br>CCTACACGACGCTCTTCCGATCTNAGACCGACAACTCC<br>AGGGTTTTCCCAGTCACGAC -3'   | Integrated DNA<br>Technologies | Bilate et al., 2020 |
